# Supplementary material
Source: Springer Nature journal article supplement (https://www.springermedizin.de/resource/supplementary/12889_2008_1664_MOESM1_ESM.pdf/9503682)
Supplement: MOESM1 [file 9503682]

November 2005  
382 eligible WRA\* enrolled for baseline survey

May 2006  
Implementation of WIFS and regular deworming program  
Tran Yen and Yen Binh districts (52,000 WRA)

Post-implementation  
surveys

August 2006  
338 WRA enrolled for 3-  
month survey

April 2007  
364 WRA enrolled for  
12-month survey

Compliance monitoring

July 2006  
253 WRA interviewed
